# Supplementary material
Source: Springer Nature journal article supplement (https://www.springermedizin.de/resource/supplementary/12891_2012_1656_MOESM1_ESM.pdf/9509080)
Supplement: MOESM1 [file 9509080]

**Additional file 1.** Associations (Yes/No) between physical activity and bone mass stratified by sex, anatomical site and age of physical activity assessment.

| References               | Males            |                       |                                       |                  |                                          |                                           |       |                                       |                                         |                                        | Females |                                                                 |    |       |                         |                        |       |                                      |                                       |       |
|--------------------------|------------------|-----------------------|---------------------------------------|------------------|------------------------------------------|-------------------------------------------|-------|---------------------------------------|-----------------------------------------|----------------------------------------|---------|-----------------------------------------------------------------|----|-------|-------------------------|------------------------|-------|--------------------------------------|---------------------------------------|-------|
|                          | Sample           | TB                    |                                       |                  | FN                                       |                                           |       | LS                                    |                                         |                                        | Sample  | TB                                                              |    |       | FN                      |                        |       | LS                                   |                                       |       |
|                          |                  | AD                    | AH                                    | AD/AH            | AD                                       | AH                                        | AD/AH | AD                                    | AH                                      | AD/AH                                  |         | AD                                                              | AH | AD/AH | AD                      | AH                     | AD/AH | AD                                   | AH                                    | AD/AH |
| Bakker, 2003             | 225              | -                     | -                                     | -                | -                                        | -                                         | -     | -                                     | YES <sup>MC</sup><br>NO <sup>S/MT</sup> | -                                      | 241     | -                                                               | -  | -     | -                       | -                      | -     | -                                    | NO <sup>MC</sup>                      | -     |
| Barnekow-Bergkvist, 2006 | -                | -                     | -                                     | -                | -                                        | -                                         | -     | -                                     | -                                       | -                                      | 36      | YES                                                             | NO | -     | YES                     | NO                     | -     | YES                                  | NO                                    | -     |
| Baxter-Jones, 2008       | 72               | YES <sup>C</sup>      | -                                     | -                | YES <sup>C</sup>                         | -                                         | -     | NO <sup>C</sup>                       | -                                       | -                                      | 82      | NO <sup>C</sup>                                                 | -  | -     | YES <sup>C</sup>        | -                      | -     | NO <sup>C</sup>                      | -                                     | -     |
| Cooper, 1995             | -                | -                     | -                                     | -                | -                                        | -                                         | -     | -                                     | -                                       | -                                      | 153     | -                                                               | -  | -     | NO <sup>C</sup><br>YES  | NO <sup>C</sup><br>YES | -     | NO <sup>C</sup><br>NO                | NO <sup>C</sup><br>YES                | -     |
| Delvaux, 2001            | 126              | NO <sup>C</sup><br>NO | NO <sup>C</sup><br>YES                | -                | -                                        | -                                         | -     | YES <sup>C</sup><br>NO                | YES <sup>C</sup><br>YES                 | -                                      | -       | -                                                               | -  | -     | -                       | -                      | -     | -                                    | -                                     | -     |
| Groothausen, 1997        | 182 <sup>S</sup> | -                     | -                                     | -                | -                                        | -                                         | -     | YES <sup>S</sup>                      | YES <sup>S</sup>                        | YES <sup>S</sup>                       | -       | -                                                               | -  | -     | -                       | -                      | -     | -                                    | -                                     | -     |
| Kemper, 2000             | 182 <sup>S</sup> | -                     | -                                     | -                | NO <sup>S/MT</sup><br>NO <sup>S/MC</sup> | NO <sup>S/MT</sup><br>YES <sup>S/MC</sup> | -     | -                                     | -                                       | -                                      | -       | -                                                               | -  | -     | -                       | -                      | -     | -                                    | -                                     | -     |
|                          | 84               | -                     | -                                     | -                | -                                        | -                                         | -     | YES <sup>MT</sup><br>NO <sup>MC</sup> | NO <sup>MT</sup><br>YES <sup>MC</sup>   | -                                      | 98      | -                                                               | -  | -     | -                       | -                      | -     | NO <sup>MT</sup><br>NO <sup>MC</sup> | NO <sup>MT</sup><br>YES <sup>MC</sup> | -     |
| Kemper, 2002             | 182 <sup>S</sup> | -                     | -                                     | -                | -                                        | -                                         | -     | YES <sup>MT</sup><br>NO <sup>MC</sup> | NO <sup>MT</sup><br>YES <sup>MC</sup>   | YES <sup>MT</sup><br>YES <sup>MC</sup> | -       | -                                                               | -  | -     | -                       | -                      | -     | -                                    | -                                     | -     |
| Lloyd, 2004              | -                | -                     | -                                     | -                | -                                        | -                                         | -     | -                                     | -                                       | -                                      | 75      | -                                                               | -  | -     | -                       | -                      | YES   | -                                    | -                                     | -     |
| McGuigan, 2002           | 244              | -                     | -                                     | -                | YES                                      | YES                                       | -     | YES                                   | YES                                     | -                                      | 216     | -                                                               | -  | -     | NO                      | NO                     | -     | NO                                   | NO                                    | -     |
| Mein, 2004               | -                | -                     | -                                     | -                | -                                        | -                                         | -     | -                                     | -                                       | -                                      | 62      | -                                                               | -  | -     | -                       | -                      | YES   | -                                    | -                                     | YES   |
| Neville, 2002            | 238              | -                     | -                                     | -                | YES                                      | YES                                       | -     | NO                                    | YES                                     | -                                      | 205     | -                                                               | -  | -     | NO                      | NO                     | -     | NO                                   | NO                                    | -     |
| Petit, 2004              | -                | -                     | -                                     | -                | -                                        | -                                         | -     | -                                     | -                                       | -                                      | 76      | -                                                               | -  | -     | NO                      | -                      | -     | -                                    | -                                     | -     |
| Uusi-Rasi, 2002          | -                | -                     | -                                     | -                | -                                        | -                                         | -     | -                                     | -                                       | -                                      | 92      | -                                                               | -  | -     | -                       | NO <sup>C</sup>        | -     | -                                    | -                                     | -     |
| Uusi-Rasi, 2008          | -                | -                     | -                                     | -                | -                                        | -                                         | -     | -                                     | -                                       | -                                      | 133     | -                                                               | -  | -     | -                       | NO <sup>C</sup>        | -     | -                                    | -                                     | -     |
| Valimaki, 1994           | 111              | -                     | -                                     | -                | -                                        | -                                         | YES   | -                                     | -                                       | YES                                    | 153     | -                                                               | -  | -     | -                       | -                      | YES   | -                                    | -                                     | NO    |
| Van Langendonck, 2003    | 154              | -                     | NO <sup>MT</sup><br>YES <sup>MC</sup> | NO <sup>MC</sup> | -                                        | -                                         | -     | -                                     | NO <sup>MT</sup><br>YES <sup>MC</sup>   | YES <sup>MC</sup>                      | -       | -                                                               | -  | -     | -                       | -                      | -     | -                                    | -                                     | -     |
| Wang, 2003               | -                | -                     | -                                     | -                | -                                        | -                                         | -     | -                                     | -                                       | -                                      | 341     | NO <sup>C</sup><br>NO <sup>C/SD</sup><br>NO<br>NO <sup>SD</sup> | -  | -     | NO<br>YES <sup>SD</sup> | -                      | -     | NO<br>NO <sup>SD</sup>               | -                                     | -     |
| Welten, 1994             | 84               | -                     | -                                     | -                | -                                        | -                                         | -     | YES                                   | -                                       | YES                                    | 98      | -                                                               | -  | -     | -                       | -                      | -     | NO                                   | -                                     | NO    |

TB – Total body; FN – Femoral neck; LS – Lumbar Spine; AD – Adolescence; AH – Adulthood; AD/AH – From adolescence to adulthood; C – Bone mineral content; S – analysis performed with both sexes; MT – Physical activity evaluated by METs; MC – Physical activity evaluated by mechanical strain; SD – Sedentary activity . Results with no legends used bone mineral density as outcome.
